1                   **Chromosomal-level genome assembly of the bioluminescent cardinalfish**  
2                   ***Siphamia tubifer*, an emerging model for symbiosis research**

3  
4                   Gould, AL<sup>1</sup>, JB Henderson<sup>2</sup>, AW Lam<sup>2</sup>

- 5  
6                   1. Ichthyology Department, Institute for Biodiversity Science and Sustainability, California  
7                   Academy of Sciences, 55 Music Concourse Dr. San Francisco, CA 94118  
8                   \*Corresponding author: [agould@calacademy.org](mailto:agould@calacademy.org)  
9                   2. Center for Comparative Genomics, Institute for Biodiversity Science and Sustainability,  
10                  California Academy of Sciences, 55 Music Concourse Dr. San Francisco, CA 94118  
11  
12

13                  **Abstract**

14  
15                  The bioluminescent symbiosis between the sea urchin cardinalfish *Siphamia tubifer*  
16                  (Kurtiformes: Apogonidae) and the luminous bacterium *Photobacterium mandapamensis* is an  
17                  emerging vertebrate-bacteria model for the study of microbial symbiosis. However, there is  
18                  little genetic data available for the host fish, limiting the scope of potential research that can be  
19                  carried out with this association. In this study, we present a chromosomal-level genome  
20                  assembly of *S. tubifer* using a combination of PacBio HiFi sequencing and Hi-C technologies.  
21                  The final genome assembly was 1.2 Gb distributed on 23 chromosomes and contained 32,365  
22                  protein coding genes with a BUSCO completeness score of 99%. A comparison of the *S.*  
23                  *tubifer* genome to that of another non-luminous cardinalfish revealed a high degree of synteny,  
24                  whereas a similar comparison to a more distant relative in the Gobiiformes order revealed a  
25                  fusion of two chromosomes in the cardinalfish genomes. An additional comparison of  
26                  orthologous clusters among these three genomes revealed a set of 710 clusters that were  
27                  unique to *S. tubifer* in which 23 GO pathways were significantly enriched, including several  
28                  relating to host-microbe interactions and one involved in visceral muscle development, which  
29                  could be related to the musculature involved in the gut-associated light organ of *S. tubifer*. We  
30                  also assembled the complete mitogenome of *S. tubifer* and discovered both an inversion in the  
31                  WANCY tRNA gene region resulting in a WACNY gene order as well as heteroplasmy in the  
32                  length of the control region for this individual. A phylogenetic analysis based on the whole  
33                  mitochondrial genome indicated that *S. tubifer* is divergent from the rest of the cardinalfish  
34                  family, bringing up questions of the involvement of the bioluminescent symbiosis in the initial  
35                  divergence of the ancestral *Siphamia* species. This draft genome assembly of *S. tubifer* will  
36                  enable future studies investigating the evolution of bioluminescence in fishes as well as  
37                  candidate genes involved in the symbiosis and will provide novel opportunities to use this  
38                  system as a vertebrate-bacteria model for symbiosis research.  
39

## 40 Introduction

41

42 The cardinalfish genus *Siphamia* (Kurtiformes: Apogonidae) is comprised of 25 species, all of  
43 which are symbiotically bioluminescent. The fish has an abdominal light organ attached to the  
44 gut that harbors a dense population of a single species of luminous bacterium, *Photobacterium*  
45 *mandapamensis*, a member of the Vibrionaceae (Yoshida & Haneda 1967, Wada *et al.* 2006,  
46 Kaeding *et al.* 2007, Urbanczyk *et al.* 2011, Gould *et al.* 2021). Additional cardinalfish species  
47 belonging to at least three other genera are also bioluminescent, however those species  
48 produce light autogenously and do not form a symbiosis with luminous bacteria (Thacker &  
49 Roje 2009). Members of the *Siphamia* genus are found throughout the Indo-Pacific, but *S.*  
50 *tubifer* (Figure 1) has the broadest distribution, spanning from east Africa to the French  
51 Polynesian Islands (Gon & Allen 2012). *Siphamia tubifer* is also the most well-studied *Siphamia*  
52 species to date; previous studies have characterized the fish's life history (Gould *et al.* 2016),  
53 behavioral ecology (Eibl-Eibesfeldt 1961, Tamura 1982, Gould *et al.* 2014, 2015), and  
54 population genetics (Gould *et al.* 2017), as well as the the symbiosis with *P. mandapamensis*  
55 (Dunlap & Nakamura 2011, Dunlap *et al.* 2012, Gould *et al.* 2019, Iwai 1958, 1971). Unlike most  
56 symbiotically luminous fish species that inhabit deep water or have pelagic life histories, *S.*  
57 *tubifer* is a shallow, reef-dwelling species and can be raised in aquaria, both with and without  
58 its luminous symbiont, rendering the symbiosis to be experimentally tractable (Dunlap *et al.*  
59 2012). Thus, the *S. tubifer*-*P. mandapamensis* symbiosis an emerging model for the study of  
60 vertebrate-bacteria associations, and is especially well-suited for studies of the vertebrate gut  
61 microbiome.

62

63 Despite an accumulation of knowledge of the biology of *S. tubifer* and its symbiosis with *P.*  
64 *mandapamensis*, there is little genomic information available for the fish, limiting the scope of  
65 possible studies that can be carried out with this association. A high-quality reference genome  
66 of *S. tubifer* will unlock new research opportunities to investigate the genetic mechanisms  
67 regulating this highly specific association, further enhancing its strength as a model system.  
68 Thus, we present a chromosomal-level assembly of the genome of *S. tubifer* produced by a  
69 combination of third-generation sequencing technology (PacBio HiFi sequencing) and  
70 chromosome conformation capture methods (Hi-C, Lieberman-Aide *et al.* 2009, vanBerkum *et*  
71 *al.* 2010). We then compare our *S. tubifer* genome assembly and annotation to that of other  
72 chromosomal-level assemblies of a closely related but non-luminous cardinalfish species and a  
73 more distant relative in the sister order Gobiiformes to describe synteny between the genomes  
74 and identify candidate genes that could be involved in the symbiosis. We also present a whole  
75 mitochondrial genome assembly of *S. tubifer* and use this sequence information to infer *S.*  
76 *tubifer*'s phylogenetic position within the cardinalfish family, providing further insight into the  
77 evolution of this bioluminescent symbiosis.

78

## 79 Methods

80

81 *Tissue collection, DNA extraction and sequencing*

82

83 All tissue was obtained from a single female *Siphamia tubifer* specimen collected from a  
84 shallow reef in Okinawa, Japan (26.66°N, 127.88°E). The fish was collected and euthanized  
85 following approved protocols and permits for the capture, care and handling of fish by the  
86 California Academy of Science's Institutional Animal Care and Use Committee. Immediately  
87 following euthanasia, fresh muscle tissue was sampled from the flanking region of the fish for  
88 high molecular weight (HMW) DNA extraction using a phenol-chloroform extraction protocol  
89 provided by Pacific Biosciences of California, Inc. Fresh muscle and brain tissue were also  
90 sampled from the same individual for Hi-C methods. The HMW DNA was prepared for PacBio  
91 HiFi sequencing at UC Berkeley's QB3 Genomics Sequencing Lab (Berkeley, CA) and  
92 sequenced on one Sequel II 8M SMRT Cell.

93

#### 94 *Hi-C library preparation and sequencing*

95

96 *In situ* Hi-C libraries were prepared from the freshly homogenized muscle and brain tissues  
97 following the protocol described in Rao *et al.* (2014) with slight modifications. After the  
98 Streptavidin pull-down step, the biotinylated Hi-C products underwent end repair, ligation, and  
99 enrichment using the NEBNext® Ultra™II DNA Library Preparation kit (New England Biolabs  
100 Inc, Ipswich, MA). Titration of the number of PCR cycles was performed as described in Belton  
101 *et al.* (2012). The final libraries were then sequenced as paired-end 150 bp reads on the  
102 Illumina NovaSeq 6000 platform by Novogene Corporation, Inc. (Sacramento, CA).

103

#### 104 *Genome size estimation, assembly and chromosome mapping*

105

106 Circular Consensus Sequences (CCS) were generated using ccs v5.0.0  
107 (<https://github.com/PacificBiosciences/pbtheoconda>), from 35.95M subreads, representing  
108 442.25G bases, and filtered to produce HiFi reads, defined as having at least two circular  
109 passes and minimum of 99.9% accuracy. A custom script created a .fastq file containing the  
110 HiFi reads extracted from the .bam output file of the ccs step. Jellyfish (Marcais & Kingsford  
111 2012) was then used to count and create histograms of kmers size 21 and 25 from the HiFi  
112 reads, and GenomeScope v2.0 (Ranallo-Benavidez *et al.* 2020) was run on each set to  
113 determine estimates of genome size.

114

115 Next, filtering was performed to remove contaminant sequences. Since using blastn (Altschul  
116 *et al.* 1990) and other similar tools is inefficient with long reads, we first used minimap2 (Li  
117 2018) with the genome of the closely related orbiculate cardinalfish, *Sphaeramia orbicularis*, to  
118 exclude matching reads from further contaminant analysis. For the remaining sequences,  
119 blastn was then used against a database of *Siphamia tubifer*'s luminous symbiont,  
120 *Photobacterium mandapamensis* (Urbanczyk *et al.* 2011), to identify its sequences as  
121 contaminants. Additionally, to further reduce the analysis, the first 500 bases of the remaining  
122 long reads were used as blastn queries against the nt database with option -taxidlist restricting  
123 search to bacteria, and those excluded with e-value greater than -1e10. Similarly,  
124 mitochondrial DNA sequences were identified and removed for separate analysis by using

125 blastn against a database of three Apogonidae mitochondrial genomes: *S. orbicularis*,  
126 *Ostorhinchus fleurieu*, and *Pristicon trimaculatus*. Subsequent nuclear genome analysis used  
127 the remaining long read HiFi sequences with contaminant and mitochondrial sequences  
128 removed.

129

130 The remaining HiFi sequences were assembled with hifiasm v0.13-r308 (Cheng *et al.* 2021).  
131 The hifiasm assembly program is designed for HiFi reads produced from a diploid genome and  
132 also incorporates purge\_dups (Guan *et al.* 2020) to separate out duplicate haplotigs, producing  
133 a primary assembly of the higher quality contigs and an alternate assembly of contigs including  
134 the duplicates. For comparison, we also ran Improved Phase Assembler, ipa v1.3.0,  
135 (PacificBiosciences 2020) to create an assembly from the same input. We then ran quickmerge  
136 v0.3 (Chakraborty *et al.* 2016) for a third assembly where the hifiasm result was used as the  
137 query and the ipa output as a reference assembly to attempt to bridge gaps in the hifiasm  
138 genome representation.

139

140 The Hi-C reads, consisting of 624.35M combined brain and muscle tissue read pairs, were  
141 mapped using juicer v1.6 (Durand *et al.* 2016b) against the hifiasm assembled contig level  
142 genome. We next ran 3d-dna v180922 (Dudchenko *et al.* 2017) with its early-exit flag to create  
143 an input file for JuiceBox Assembly Tools (JBAT) (Durand *et al.* 2016a, Dudchenko *et al.* 2018)  
144 that represents the assembly with contigs ordered and oriented in a candidate chromosomal  
145 level depiction. Using JBAT, we interactively updated location and orientation of contigs and  
146 their delineation at the chromosome level (Figure 2a). This assembly was also queried against  
147 the nt database using blastn to identify any additional contaminants for removal.

148

149 To assess the level of genome completeness, we ran BUSCO v5.12 (Simão *et al.* 2015) with the  
150 3,640 entry Actinopterygii dataset in both its MetaEuk (Karin *et al.* 2020) and AUGUSTUS  
151 (Keller *et al.* 2011) modes. We then used a custom script to update BUSCOs found by  
152 AUGUSTUS that were missing in the MetaEuk results and another to report the combined  
153 BUSCO scores.

154

### 155 *Gene annotation and syteny*

156

157 Prior to gene annotation, *de novo* repeats were identified from the *S. tubifer* genome assembly  
158 using RepeatModeler v2.0.1 (Flynn *et al.* 2020). First, the .fasta file representing these species  
159 specific repeat models and the vertebrate repeat models from Repbase  
160 (<https://www.repeatmasker.org>) RepeatMasker libraries v20181026 were appended into a  
161 combined file. This file was then used as the input library to Repeatmasker v4.0.9 (Smit *et al.*  
162 2013-2015) with the options -small -xsmall and -nolow to create the soft-masked repeat  
163 version of the assembly file used for gene model annotation. BRAKER2 (Brůna *et al.* 2021),  
164 using GeneMark-EP+ (Brůna *et al.* 2020) and AUGUSTUS, combined with the vertebrate  
165 protein database from OrthoDB v10 (<https://www.orthodb.org>) (Kriventseva *et al.* 2019), was

166 used for gene annotation. The output of potential gene models represented in .gff3, amino  
167 acid, and DNA files were subject to additional filtering together with functional annotation.

168  
169 To check for protein domains, we ran InterProScan v5.51-85.0 (Jones *et al.* 2014) on the amino  
170 acid sequences found in the BRAKER2 results. These sequences were also used as queries for  
171 a blastp run on three databases: SwissProt, TrEMBL, and the vertebrate proteins from  
172 OrthoDB v10. The DNA versions of the sequences were also queried with blastn against the nt  
173 database downloaded on February 13, 2021. Gene models, in .gff3, amino acid, and DNA files,  
174 were kept for those sequences with an InterProScan determined protein domain and one of the  
175 four database searches yielding a match with an e-value 0.1e-6 or less. These files were then  
176 updated with the matching descriptions indicating they were similar to the highest scoring  
177 match of the four searches. Protein domain IDs and Gene Ontology (GO) terms, as determined  
178 by the InterProScan output, were added to the .gff3 file for each retained gene model as was  
179 the functional annotation description. tRNAscan-SE v2.0.8 (Chan *et al.* 2021) was implemented  
180 to identify tRNAs throughout the genome.

181  
182 We then compared the genome annotation of *S. tubifer* to that of the closely related non-  
183 luminous cardinalfish, *Sphaeramia orbicularis*, and to a more distant member of the sister order  
184 Gobiiformes, the mudskipper *Periophthalmus magnuspinnatus*, using OrthoVenn2 (Xu *et al.*  
185 2019). We determined the number of shared and unique protein clusters among these species  
186 and carried out a GO enrichment analysis on the unique clusters identified for *S. tubifer*. Next,  
187 we examined synteny between our *S. tubifer* genome assembly and the chromosomal-level  
188 genomes of both *S. orbicularis* (GenBank GCF\_902148855.1) and *P. magnuspinnatus*  
189 (GenBank GCA\_009829125.1) using the set of single copy orthologs identified from the  
190 BUSCO (Simão *et al.* 2015) Actinopterygii gene set and converted the output for visualization in  
191 Circos (Krzywinski *et al.* 2009) using custom scripts.

192  
193 *Mitochondrial genome assembly and analysis*

194  
195 Mitochondrial genome analysis was based on sequences matching at least 60% query  
196 coverage in a blastn match (qcovus format specifier) to one of the three Apogonidae  
197 mitochondrial genomes; *S. orbicularis*, *O. fleurieu*, and *P. trimaculatus*. When matched to the  
198 reverse strand, sequences were reverse complimented and \_RC was appended to the name,  
199 resulting in all sequences having the same strand orientation. Megahit (Li *et al.* 2015) was then  
200 run on these sequences to assemble a draft mitogenome and MITOS2 (Bernt *et al.* 2013) was  
201 used to annotate the mitogenome.

202  
203 GenBank annotations for the three Apogonidae mitogenomes were downloaded and their  
204 sequences were extracted into .fasta files containing records corresponding to the genome's  
205 rRNAs, tRNAs, and protein coding genes. The *S. tubifer* mitochondrial HiFi reads were queried  
206 with a subject database of these sequences from the three mitogenomes using blastn with its -  
207 task blastn option (overriding default -task megablast). These matches were then used to split

208 reads into three sets of new .fasta records using tRNA *Phe* and *Pro* as markers: (a) *Phe* to *Pro*  
209 (or end of read if no *Pro*), (b) if no *Phe*, then beginning of read to *Pro*, (c) *Pro* to *Phe* when both  
210 found, capturing the complete control region in between. The first 2 sets were used for tRNA  
211 analysis, including tRNA order, and the third set was used for control region repeat and  
212 heteroplasmy analysis. Mitfi (Jühling *et al.* 2012) was used to identify tRNAs from 176 reads  
213 from sets (a) and (b) that matched at least 90% query coverage to one of the three closely  
214 related species' mitogenomes. Tandem Repeat Finder (TRF) (Bensen 1999) was run to find  
215 repeats in the control region set.

216

217 Using the whole mitochondrial genome assembly, the phylogenetic placement of *S. tubifer*  
218 within the cardinalfish family was inferred. This analysis also included one *Kurtus* species and  
219 several species of gobies for reference, as well as two members of the Syngnathiformes order  
220 as an outgroup. Whole mitochondrial sequences (excluding the control regions) were aligned  
221 using MAFFT (Kato *et al.* 2002), and the aligned reads were used to construct maximum  
222 likelihood trees with raxml-ng (Kozlov *et al.* 2019) using the substitution model with the lowest  
223 BIC score as predicted by IQtree (Nguyen *et al.* 2015) and 500 bootstrap replicates.

224

## 225 **Results**

226

### 227 *Genome size estimation, assembly, and chromosome mapping*

228

229 A total of 2,110,443 HiFi CCS reads consisting of 27,799,385,228 bp were generated from the  
230 single HiFi library, with a polymerase N50 of 183,061 and subread N50 of 13,439. Over 97% of  
231 the HiFi reads were between 12,000 and 15,000 bp. From these sequences, the  
232 GenomeScope size estimate, using kmer lengths 21 and 25, ranged from 947,587,691 to  
233 964,260,239 bp. Repeat length was estimated as 215,783,447 to 256,391,534 bp, though  
234 repeat length is often underestimated by kmer counting models, leading to a lower overall  
235 estimate of genome size. After contaminant and mitochondrial sequence removal 2,109,973  
236 sequence reads were left with 6,158,291 bp excluded from the source HiFi reads. These  
237 remaining sequences were used as input for the assembly programs hifiasm and ipa. Based on  
238 contiguity and accuracy metrics, we used the hifiasm assembly to scaffold with the Hi-C  
239 reads.

240

241 For the Hi-C libraries, a total of 742,280,226 and 506,411,380 reads were produced from the  
242 muscle and brain tissue, respectively. Of those, 100% of the muscle reads and 99.98% of the  
243 brain reads were clean and of high quality, resulting in GC contents of 39.3% and 43.9%. The  
244 Juicer mapping program found 245,145,667 read pairs having Hi-C contacts. After interactive  
245 modification with JBAT, guided by the 3d-dna program contig placement and orientation, the  
246 resulting genome assembly was 1.2 Gb distributed on 23 chromosomes, and 1.81% unplaced  
247 scaffolds, with a contig N50 of 2.3 Mb and scaffold N50 of 51.1 Mb (Table 1), and 37.71% GC  
248 content. There are 1,960 contigs constituting chromosomal sequences. An additional two  
249 dozen smaller contig records were identified as contaminants by the final nt blastn search  
250 (primarily Arthropoda, though of unknown origin) and were removed to produce the final

251 assembly. This assembly has the same summary statistics reported above except for the  
252 unplaced scaffold percentage, which was slightly lower (1.74%).

253

254 The 23 chromosomes in the *S. tubifer* genome assembly are numbered 1 to 22 and 24 based  
255 on synteny with another cardinalfish genome, the 23 chromosome *S. orbicularis* genome  
256 assembly fSphaOr1.1 (GenBank GCF\_902148855.1), which is based on synteny with the 24  
257 chromosome medaka genome (GenBank ASM223467v1), representing the fusion of the  
258 medaka chr23 into a cardinalfish chromosome.

259

260 BUSCO completeness assessment from the 3,640 entry Actinopterygii dataset show 99%  
261 complete with just 13 of the genes not found (MetaEuk mode: 98% complete, AUGUSTUS  
262 mode: 97.2% complete).

263

#### 264 *Genome annotation and statistics*

265

266 Repeat analysis indicated 626,216,533 bp, or 52.11% of the genome, classified as repeats, of  
267 which, most (23.7% of the genome) are DNA repeat elements. Additionally, 7.03% of the  
268 genome contains long interspersed nuclear elements (LINEs), with 16.28% of the genome  
269 characterized as unclassified repeats. The extent of repeats may account for the discrepancy  
270 between the assembly size and the GenomeScope estimates using kmer counts.

271

272 Gene annotation identified 30,117 gene models with a total length of 360,171,123 bp, (29.99%  
273 of the genome). Exons at 53,076,342 bp are 4.42% of the genome and average 9.64 per gene;  
274 fewer than 10% are single exon genes. Additional per chromosome details of genes, exons,  
275 and introns are outlined in Table 2. The orbiculate cardinalfish, *S. orbicularis* (GenBank  
276 Annotation Release 100 2019-08-03), was the closest functional annotation reference for  
277 17,079 (56.7%) of the 30,117 *S. tubifer* gene models. This was followed by several other fish  
278 species: *Lates calcarifer* (n=2,317), *Seriola dumerili* (n=1,357), *Larimichthys crocea* (n=995), and  
279 *Stegastes partitus* (n=779).

280

281 The orthologous cluster analysis indicated that a much lower number of protein clusters were  
282 shared between *S. tubifer* and the mudskipper *P. magnuspinnatus* (n=419) than with the other  
283 cardinalfish *S. orbicularis* (n=1,743). However, *S. orbicularis* shared a much larger number of  
284 clusters with *P. magnuspinnatus* (n=1,484) than did *S. tubifer*. There were also 710 unique  
285 protein clusters that were present only in the *S. tubifer* genome (Figure 3a), of which 506 were  
286 assigned to GO categories (Table S1). Overall, the largest percent of these clusters were  
287 categorized as biological processes (GO:0008150) (26%) and cellular processes (GO:0009987)  
288 (16%), and another 8% and 5% were identified as response to stimulus (GO:0050896) and  
289 developmental processes (GO:0032502), respectively (Figure 3b). The largest cluster was made  
290 up of 70 proteins assigned as DNA integration (GO:0015074), and the second largest cluster  
291 contained 41 proteins relating to visual perception (GO:0007601). There were also 9 genes  
292 unique to *S. tubifer* that were categorized as immune system processes (GO:0002376) (Table  
293 S2). An enrichment analysis of these unique clusters also revealed 26 functions that were

294 significantly enriched ( $p > 0.01$ ). Of those, several were related to viral penetration (GO:0075732)  
295 and integration (GO:0044826) into a host as well as visceral muscle development  
296 (GO:0007522) (Table 3).

297

### 298 *Genome synteny*

299

300 Overall a high degree of synteny between the genomes of *S. tubifer* and the nonluminous,  
301 orbiculate cardinalfish *S. orbicularis* was observed (Figure 4a). Of the 3,555 orthologous genes  
302 from the BUSCO set only 2.5% ( $n=90$ ) changed chromosomal assignment. A comparison to a  
303 more distantly related fish species, the mudskipper *P. magnuspinnatus*, a member of the sister  
304 order Gobiiformes revealed that a merge occurred between *P. magnuspinnatus* chromosomes  
305 12 and 23 to become chromosome 12 in both cardinalfish genomes (Figure 4b). Thus, the  
306 mudskipper genome has one more chromosome ( $n=24$ ) than both *S. tubifer* and *S. orbicularis*  
307 ( $n=23$ ).

308

### 309 *Mitochondrial genome*

310

311 There were 5,124,329 total bp in the 392 HiFi reads that matched the cut-off of 60% query  
312 coverage used in the mitochondrial sequence analysis. Assuming a mitogenome is between  
313 16,000 and 18,000 bp, this represents 285–320x coverage. There were 176 reads in which 90%  
314 or greater of the read length was covered containing 2,302,235 bp.

315

316 The complete mitochondrial genome averaged 17,905 bp, but varied due to heteroplasmy in  
317 the length of the control region (Figure 5a). There were 13 protein coding genes, 22 tRNA  
318 genes, and 2 rRNA genes, as expected for a vertebrate mitogenome. However, there was an  
319 inversion of two genes detected within the region that codes for five mitochondrial tRNAs  
320 (tryptophan, alanine, asparagine, cysteine, and tyrosine), known as the WANCY region,  
321 resulting in the order of these genes to appear as WACNY (Figure 5a). Their order was  
322 determined by Mitfi annotation of the 176 HiFi reads. All of the reads had enough tRNAs to  
323 affirm the WACNY order; 174 encompassed all of these 5 tRNA genes, and the other two reads  
324 began with CNY and NY, also indicating the WACNY gene order. There were also 135 HiFi  
325 read excerpts that encompassed the *Pro* tRNA gene, the entire control region (CR), and the  
326 *Phe* tRNA gene from which we determined the CR lengths (excluding the *Pro* and *Phe*  
327 sequences). The length of the CR ranged from 2,620 to 6,544 bp with a mean of 4,243 bp  
328 (median = 4,317 bp) (Figure 5b). Of the 135 sequences, 130 had a 60 bp repeat beginning after  
329 the *Pro* tRNA (consensus sequence:

330 CCCCCGTTTCGGGCTTTGCTTAAGTCCATGCTAATATATTTCTTTTTTTTTTCGTCCGCA), and  
331 the other 5 reads had similar repeats. This sequence, or a 1 to 4 nucleotide indel or SNP  
332 variation of it, was repeated just under twice up to 69 times in each read. A goose hairpin  
333 sequence (Quinn & Wilson 1993), in this case  $C_7TAC_7$ , was found in 133 of the 135 CR  
334 sequences (the two others had  $C_7TCAC_7$  and  $C_7TAC_4CAC_8$ ). All of the hairpins started between  
335 350–360 bp from the end of the CR region (the base before the start of tRNA *Phe*), with 105 of  
336 them 353 bp or 354 bp from the end (Figure 5a).



337

338 The maximum likelihood phylogeny based on whole mitochondrial sequences (excluding the  
339 control region) indicates that *Siphamia tubifer* is divergent from rest of the Apogonidae but a  
340 member of the Apogonoidei clade, which also contains the *Kurtus* genus and is sister to the  
341 Gobioidae clade (Ghezelayagh *et al.* 2021) (Figure 6). The placement of *S. tubifer* as divergent  
342 from the other apogonids is also observed when analyzing a concatenation of several  
343 mitochondrial genes, excluding the WANCY tRNA genes (Figure S1). An analysis of *COI* on its  
344 own, however, does not align with the other tree topologies, nesting *Siphamia tubifer* within the  
345 cardinalfishes, sister to *Ostorhinchus novemfasciatus*, although with low bootstrap support  
346 (Figure S1).

347

## 348 Discussion

349

350 Combining PacBio HiFi sequencing with Hi-C technology, we assembled a high-quality,  
351 chromosome-level genome for the symbiotically luminous cardinalfish *Siphamia tubifer*.  
352 The BUSCO score of 99% completeness indicates that this is a near complete genome and  
353 will thus serve as a valuable resource for future studies, particularly as the bioluminescent  
354 symbiosis between *S. tubifer* and *P. mandapamensis* continues to develop as a tractable,  
355 binary model system for symbiosis research. This is only the second cardinalfish genome  
356 assembly to date, and our comparison of the two indicates there is significant synteny between  
357 them, despite the divergence of *S. tubifer* from the rest of the family. An additional comparison  
358 to a more distant genome belonging to the sister order Gobiiformes, revealed a merging of two  
359 chromosomes resulting in one fewer chromosome in the cardinalfish genomes. This  
360 chromosome fusion also supports the lack of a chromosome 23 in the labelling of the *S.*  
361 *orbicularis* chromosomes, which were named based on synteny with the medaka genome.  
362 Determining whether this is a common feature of all cardinalfish genomes and when this merge  
363 occurred would require additional chromosomal-level genome assemblies for species in the  
364 two orders.

365

366 The orthologous cluster analysis between *S. tubifer*, a non-luminous cardinalfish species, and a  
367 more distant relative in the Gobiiformes order revealed 710 protein clusters unique to *S. tubifer*.  
368 Among these unique clusters, there could be candidate genes that play an important role in the  
369 bioluminescent symbiosis. In particular, several clusters were assigned GO terms with  
370 functions relating to the immune system and interactions between organisms. There were also  
371 several GO terms relating to virus-host interactions that were significantly enriched in the  
372 unique protein clusters identified for *S. tubifer*. Although it would require further investigation,  
373 the genes involved could play a role in the fish's interaction with the luminous symbiont. Also of  
374 note, visceral muscle development was enriched in the set of unique *S. tubifer* genes. The  
375 disc-shaped light organ of *S. tubifer* develops as an outcropping of the gut epithelia and is  
376 covered by a lens composed of bundles of transparent muscle tissue on its ventral side.  
377 Translucent musculature known as the diffuser also runs along the ventral surface of the fish  
378 from the caudal peduncle to the throat, which acts to disperse the light produced by the

379 bacteria inside the light organ (Iwai 1971, Dunlap & Nakamura 2011). The genes associated  
380 with the visceral muscle development clusters enriched in *S. tubifer* could be responsible for  
381 the development of the light organ and its associated musculature. Additionally, the second  
382 largest protein cluster unique to *S. tubifer* was associated with visual perception. There is large  
383 overlap in the genes expressed in the light organ and eyes of the symbiotically luminous squid,  
384 *Euprymna scolopes*, and the genetic signature specific to the squid light organ includes  
385 crystallin and reflectin genes, both of which are typical features of the vertebrate eye (Belcaid  
386 *et al.* 2019). Thus, the large cluster of proteins relating to visual perception unique to *S. tubifer*  
387 could similarly be related to genes associated with the light organ, such as crystallin and  
388 reflection genes. Future studies are needed to determine if the same overlap between the light  
389 organ and eye transcripts exist for *S. tubifer*.

390

391 A byproduct of HiFi reads for vertebrates, and many bilaterians, is the large percentage of  
392 mitogenome sequence captured in an individual read (Formenti *et al.* 2021). These genomes  
393 are typically in the range ~16,000 to ~22,000 bp, and their GENBANK annotations canonically  
394 start at tRNA *Phe* and end at the control region, which makes them amenable to discover  
395 reordering, duplicated regions leading to pseudo-genes, duplicated control regions, control  
396 region repeats, and heteroplasmy associated with those and other elements of the  
397 mitogenome. With 176 mitochondrial HiFi reads in this study, each a significant percentage of  
398 the mitogenome, we were able to determine the unique WACNY ordering of the vertebrate  
399 WANCY region of tRNAs of this individual not reported in 3,034 MitoFish website annotations  
400 (downloaded June 3, 2021 from <http://mitofish.aori.u-tokyo.ac.jp>). However, mitochondrial  
401 gene-order rearrangements have been observed multiple times in teleost fishes (e.g. Inoue *et al.*  
402 2003, Poulsen *et al.* 2013), including rearrangements in the WANCY region. For example, a  
403 WNCAY tRNA gene order was observed for the blunt snout smooth-head *Xenodermichthys*  
404 *copei* and was most parsimoniously explained by duplications of parts of the mt genome with  
405 subsequent deletions (Poulsen *et al.* 2019). Additional sequencing of the mitochondrial  
406 genomes of more *S. tubifer* specimens as well as other *Siphamia* species would indicate  
407 whether the WACNY gene order observed in this study is unique to this individual or is a  
408 common feature of this species or genus.

409

410 PacBio HiFi reads have lower error rates than earlier long read technology, though of course  
411 errors exist and homopolymer miscalls are a known class of these. It is likely that some of the  
412 differences in the 135 reads that incorporated an entire control region, flanked by the expected  
413 tRNAs, come from sequencing error and not the control region itself. However, given that the  
414 final part of the CR, which is not repetitive, varies much less in length and sequence than the  
415 repeat section of the CR, and the fact that there are almost 4,000 bp between the smallest and  
416 largest representations (and over 2200 bp between second smallest and second largest),  
417 repeat expansion and/or contraction is likely occurring in the mitochondria of this organism.  
418 Heteroplasmy in the length of the control region has been documented for other fish species,  
419 including the three-spined stickleback (Stärner *et al.* 2004), two species of sardines (Samonte  
420 *et al.* 2000), the flatfish *Platichthys flesus* (Hoarau *et al.* 2002), and several sturgeon species  
421 (Ludwig *et al.* 2000). Such variability in the copy number of tandem repeats in the control

422 region could be a more common occurrence that has been overlooked with previous  
423 sequencing approaches. Thus, the ability of HiFi reads to reveal heteroplasmy in the  
424 mitogenome could lead to increased observations of this phenomenon in other organisms (e.g.  
425 Formenti *et al.* 2021) as HiFi sequencing becomes more widely implemented. Importantly,  
426 variability in the length of the control region has previously been used as a genetic marker to  
427 discriminate between species (e.g. Faber & Stepien 1998, Turanov *et al.* 2019). If heteroplasmy  
428 in the control region is a more common occurrence, then its use as a marker could be  
429 erroneous in many cases.

430

431 The phylogenetic analysis based on whole mitochondrial genome sequences indicated that *S.*  
432 *tubifer* is divergent from the other members of the cardinalfish family Apogonidae, a placement  
433 previously supported and estimated to have occurred approximately 50 million years ago  
434 (Thacker 2014). The evolutionary relationship of *S. tubifer* as sister to the rest of the  
435 cardinalfishes raises the possibility that the bioluminescent symbiosis with *P. mandapamensis*  
436 played a role in the host's initial divergence and speciation from a common ancestor. The  
437 acquisition of bacterial endosymbionts was proposed nearly a century ago as a primary  
438 mechanism by which new species can arise (Wallin 1927), and speciation by symbiosis has  
439 since been documented, primarily for several insect hosts (Brucker & Bordenstein 2012).  
440 Future studies identifying host genes involved in the *S. tubifer*-*P. mandapamensis* symbiosis  
441 will help determine whether there is any evidence that the symbiosis played a role in speciation  
442 for *Siphamia*. The high-quality genome assembly for *S. tubifer* presented here will serve as a  
443 valuable resource for both the study of the evolution of symbiotic bioluminescence in fishes as  
444 well as the functional genomics of the symbiosis, further establishing the *S. tubifer*-*P.*  
445 *mandapamensis* association as a tractable model for the study of vertebrate-bacteria  
446 interactions and microbial symbiosis more broadly.

447

#### 448 **Data Accessibility**

449

450 Genome assembly and associated sequencing data are available under NCBI Bioproject  
451 PRJNA736963.

452

#### 453 **Author Contributions**

454

455 ALG conceived of the project and secured funding for the work. ALG carried out tissue  
456 dissections and AWL performed the high molecular weight DNA extractions and HI-C library  
457 preparations. JBH carried out the genome assembly and associated bioinformatics. ALG  
458 performed the phylogenetic analyses and data analyses. ALG and JBH contributed to the  
459 discussion and interpretation of the results and writing of the manuscript. All authors approve of  
460 the submitted version of this manuscript.

461

#### 462 **Funding**

463

464 Funding was provided by the National Institutes for Health (NIH-DP5-OD026405-01).

465

466 **Conflict of Interest**

467

468 The authors declare that the research was conducted in the absence of any commercial or

469 financial relationships that could be construed as a potential conflict of interest.

470 **Figures and Tables**

471

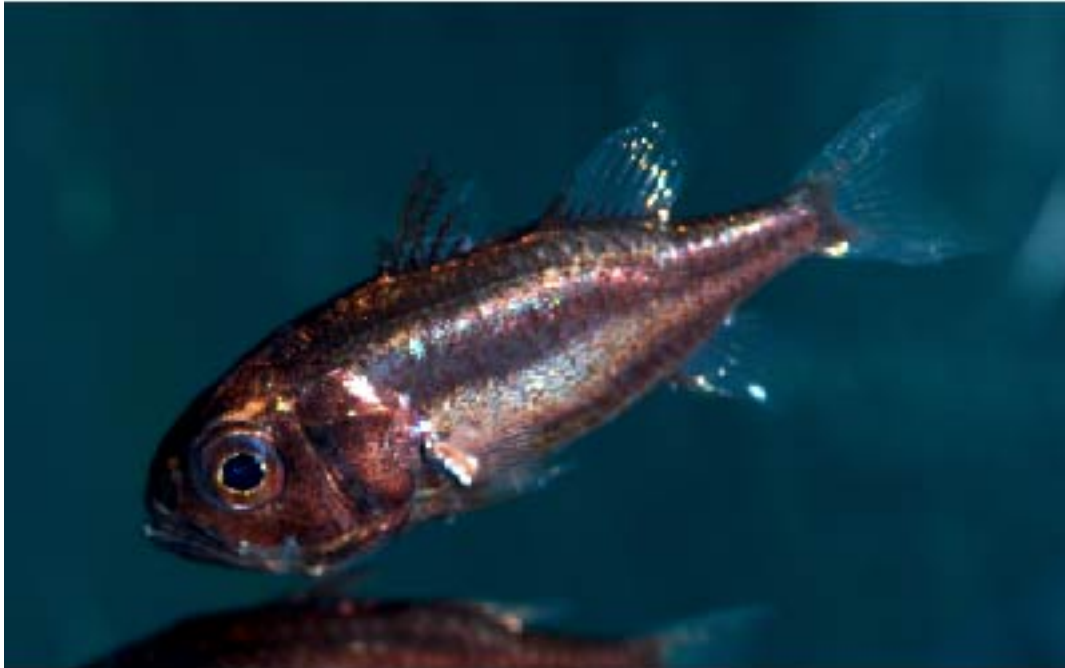

472

473 **Figure 1.** Photograph of *Siphamia tubifer*. Credit: Tim Wong, Steinhart Aquarium, California  
474 Academy of Sciences.

475

a.

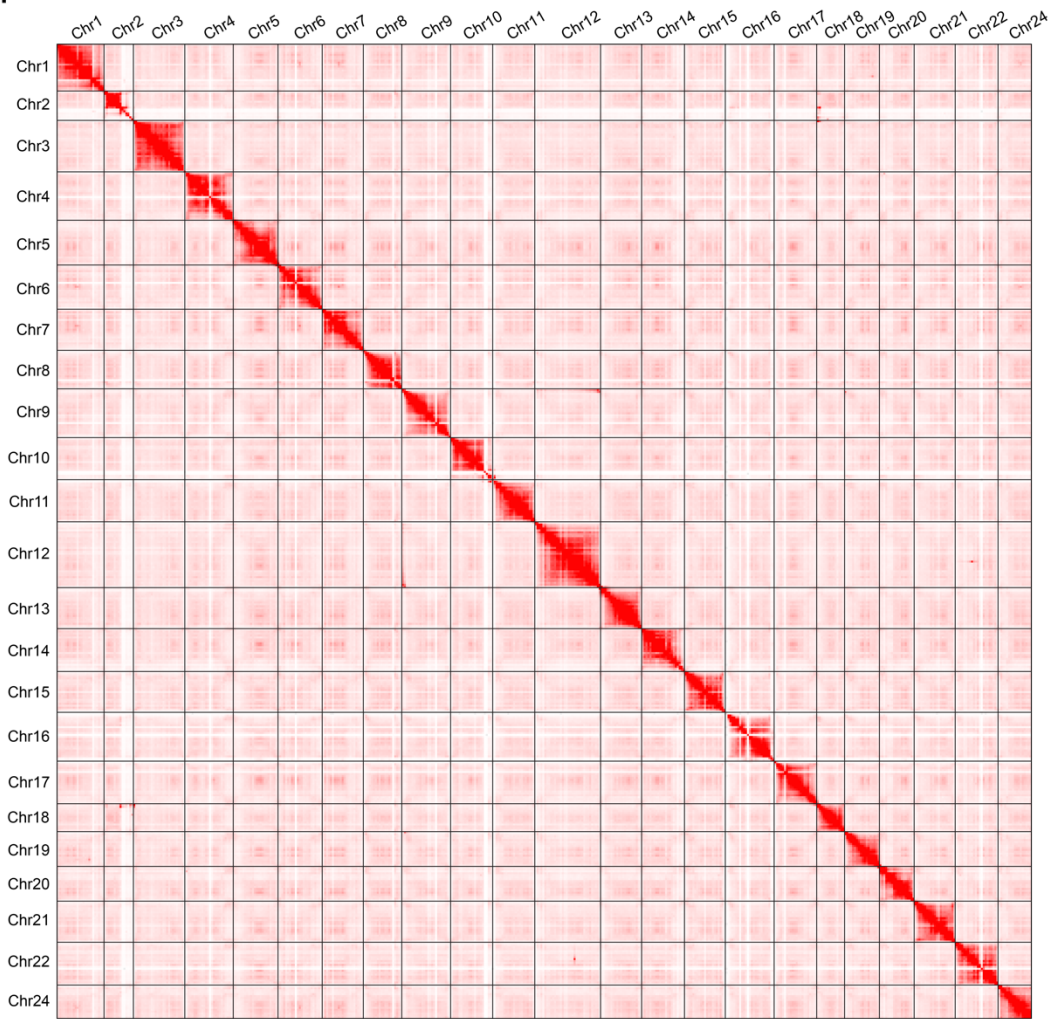

b.

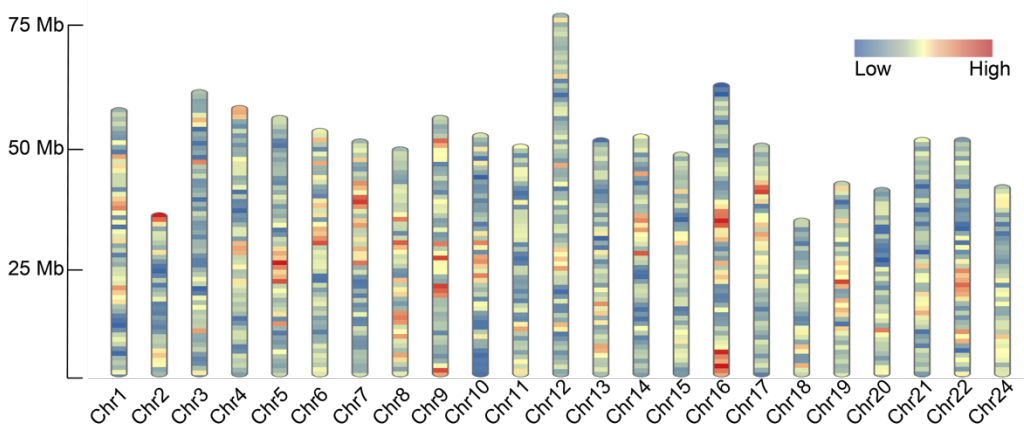

476

477

478

**Figure 2. a)** Hi-C contact heatmap for *Siphania tubifer*. Black lines indicate chromosome boundaries. **b)** Gene density distributed across the 23 chromosomes of the *S. tubifer* genome.

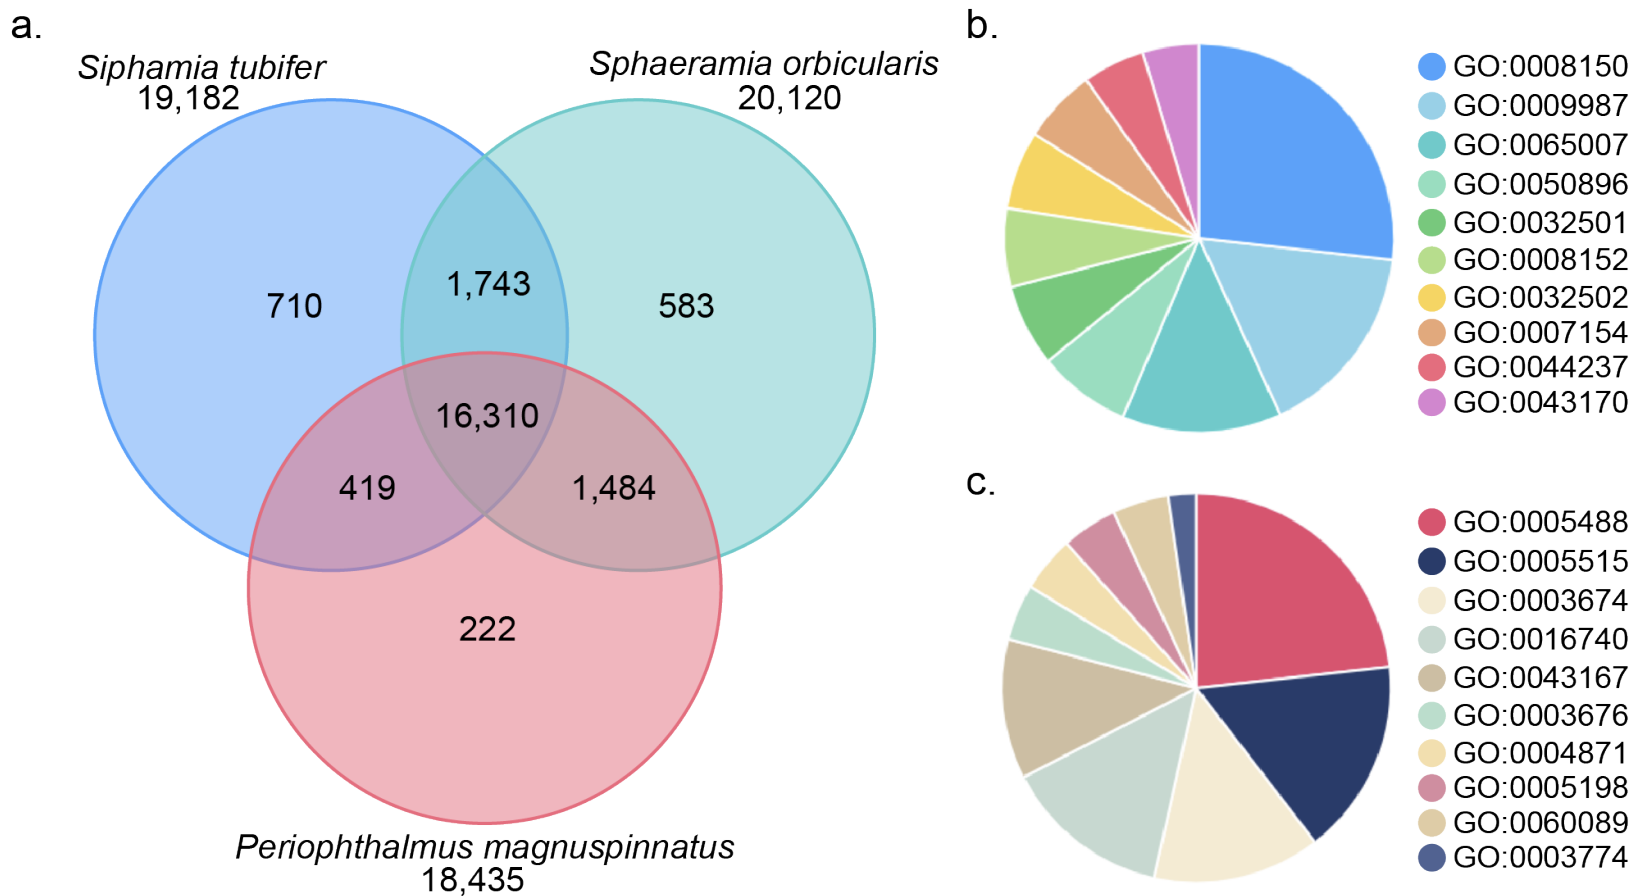

479  
480

481 **Figure 3. a)** Venn diagram of the distribution of orthologous clusters among *Siphamia tubifer*, the non-luminous cardinalfish  
 482 *Sphaeramia orbicularis*, and the mudskipper *Periophthalmus magnuspinnatus* (order Gobiiformes). **b)** Distribution of the top ten  
 483 biological process GO terms assigned to the 710 unique clusters identified for *S. tubifer* and **c)** the top ten molecular function GO  
 484 terms assigned to the gene clusters

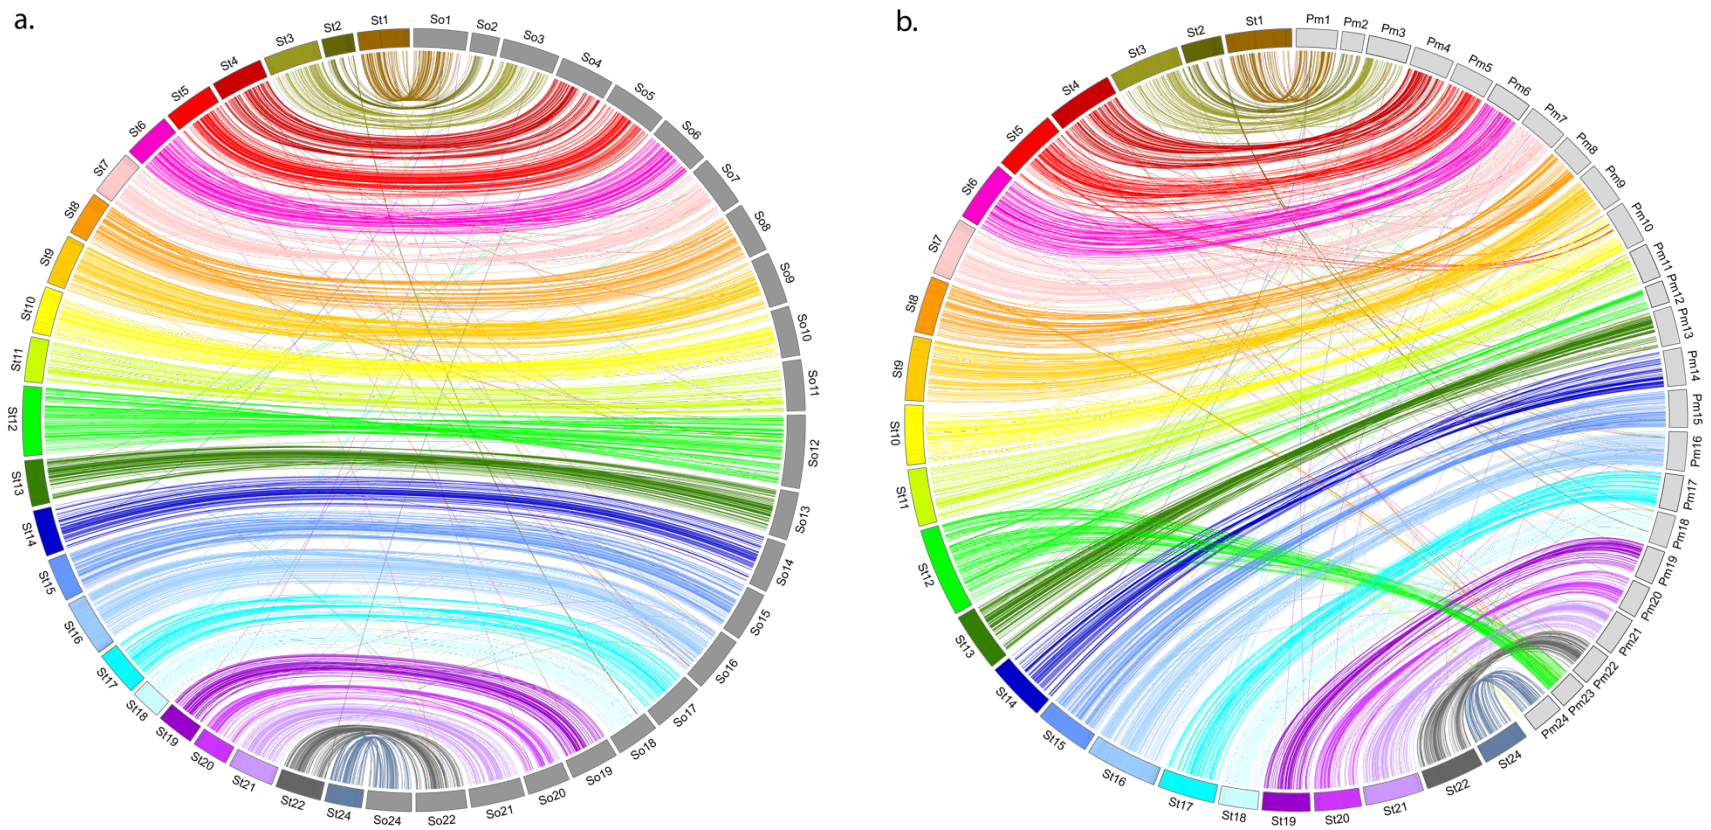

485  
 486 **Figure 4.** Circos plots depicting synteny between the genomes of *Siphamia tubifer* and **a)** the orbiculate cardinalfish, *Sphaeramia*  
 487 *orbicularis* and **b)** the mudskipper *Periophthalmus magnuspinnatus*. Each chromosome in the *S. tubifer* genome is represented by a  
 488 distinct color whereas the *S. orbicularis* and *P. magnuspinnatus* chromosomes are shown in dark and light gray, respectively. Links  
 489 between single copy orthologs from the BUSCO Actinopterygii gene set are shown.



490

a.

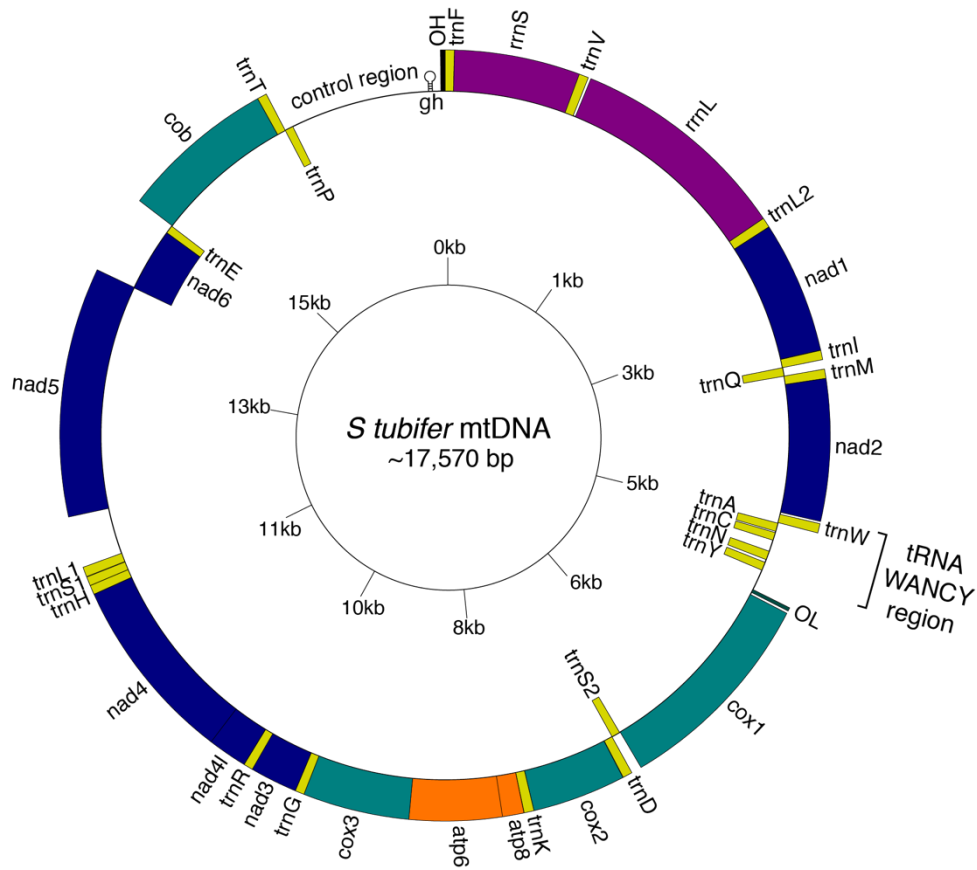

b.

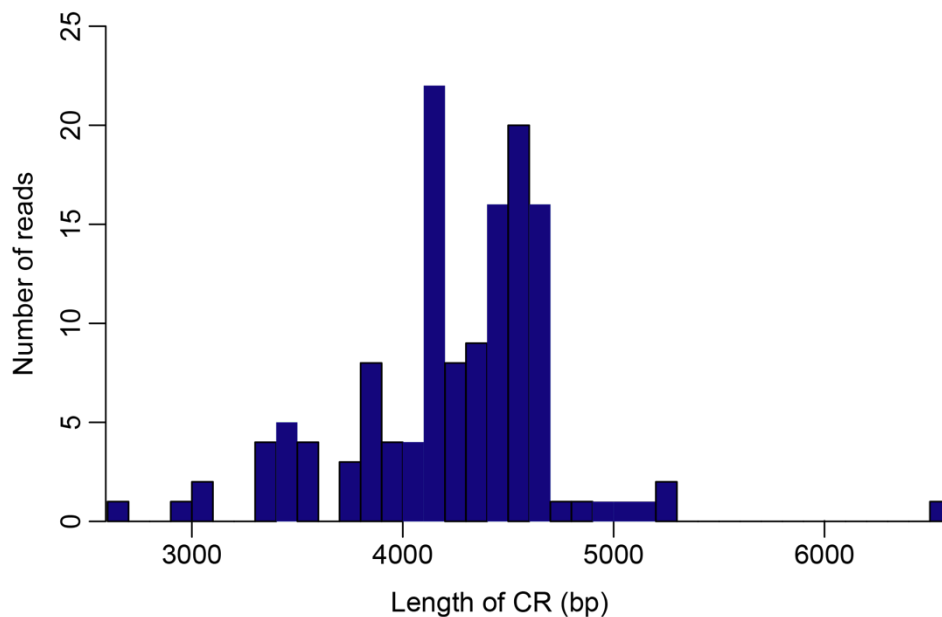

491

492 **Figure 5. a)** Gene map of the complete mitogenome of *Siphamia tubifer*. All genes are labelled  
493 in addition to the tRNA WANCY region, the control region, and the approximate location of the  
494 goose hairpin (*gh*) within the control region. **b)** Histogram depicting heteroplasmy in the length of  
495 the control region observed for the HiFi sequence reads spanning the entire region.

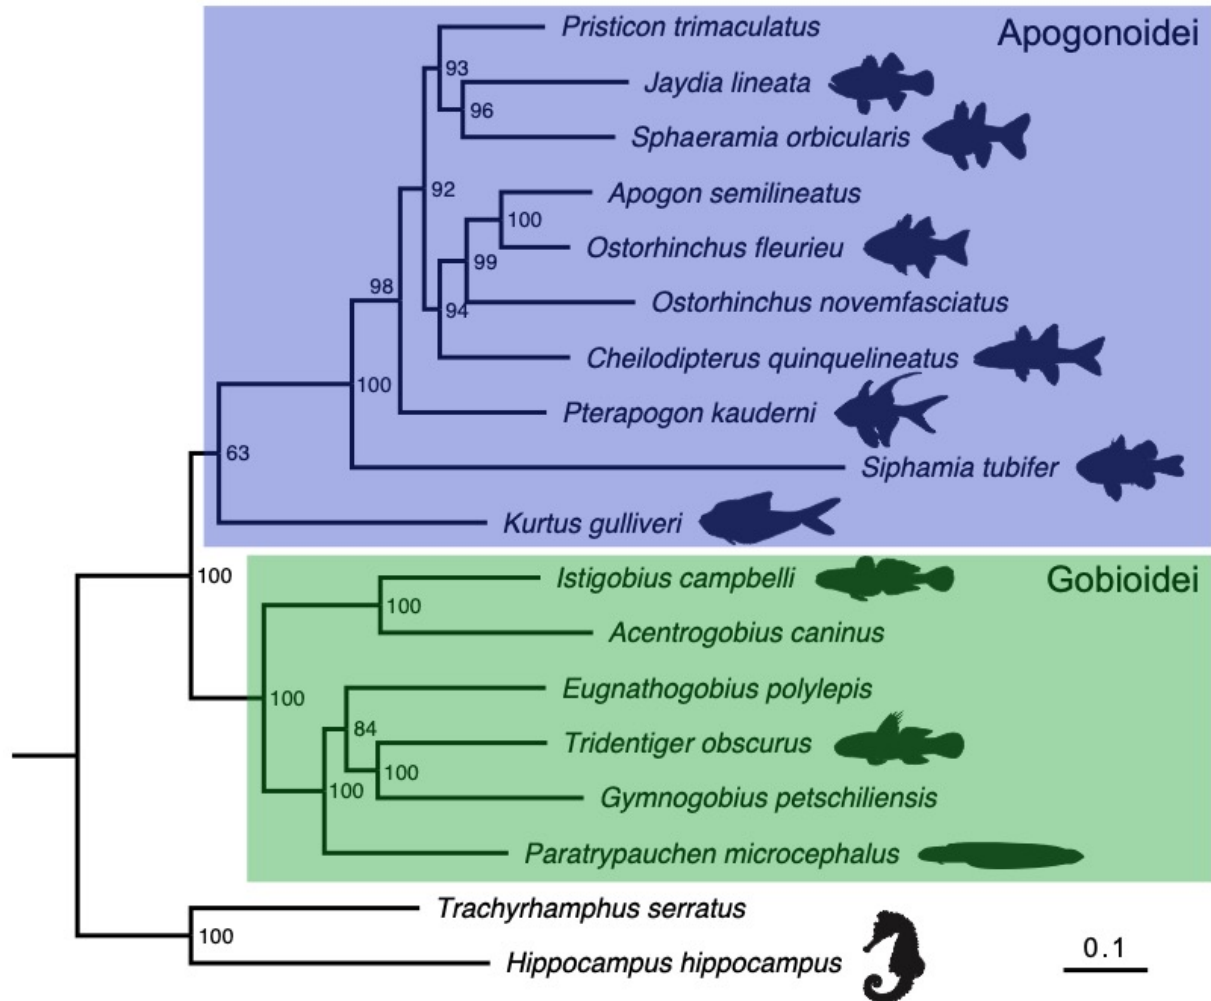

496  
 497 **Figure 6.** Maximum likelihood tree depicting the phylogenetic relationships of the cardinalfish  
 498 species for which there is whole mitochondrial genome data available, including *Siphamia*  
 499 *tubifer* from this study, in relation to another member of the Apogonoidei clade and several  
 500 species of gobies. Two Syngnathiformes species are included as an outgroup. The  
 501 relationships are based on whole mitochondrial DNA sequences excluding the control region  
 502 using the GTR+F+I+G4 model of substitution. Bootstrap support values (500 replicates) are  
 503 listed at the nodes. The scale bar indicates nucleotide substitutions per site. The GenBank  
 504 accession numbers for each species is listed in Table S3.  
 505

506 **Table 1.** Assembly statistics of the draft genome of *Siphamia tubifer*.

|                           |                    |
|---------------------------|--------------------|
| <b>Assembly size</b>      | 1,200,827,456 bp   |
| <b>Total scaffolds</b>    | 118                |
| <b>Total contigs</b>      | 2,057              |
| <b>Scaffold N50 (L50)</b> | 51,162,488 bp (11) |
| <b>Contig N50 (L50)</b>   | 2,340,513 bp (133) |
| <b>Scaffold N90 (L90)</b> | 40,504,042 bp (21) |
| <b>Contig N90 (L90)</b>   | 318,326 bp (689)   |
| <b>Total genes</b>        | 32,364             |
| <b>Mean gene length</b>   | 12,504 bp          |

507

508 **Table 2.** Annotation statistics of the *S. tubifer* genome by chromosome. For each chromosome the total length in bp and the  
509 percent of those bp belonging to genes, introns, and exons are listed as well as the number of genes, introns, exons and tRNAs.  
510 The mean length of genes, introns, and exons in each chromosome are also included.

| Chromosome | Length (bp) | %<br>Genes/Introns/Exons | Genes (mean bp) | Introns (mean bp) | Exons (mean bp) | tRNAs |
|------------|-------------|--------------------------|-----------------|-------------------|-----------------|-------|
| Chr1       | 57,520,444  | 34.6 / 29.9 / 4.5        | 1,622 (12,267)  | 12,401 (1,386)    | 14,023 (185)    | 113   |
| Chr2       | 35,111,521  | 28.6 / 24.2 / 4.3        | 906 (11,080)    | 6,733 (1,263)     | 7,639 (195)     | 271   |
| Chr3       | 61,369,824  | 30.6 / 26.9 / 3.6        | 1,349 (13,919)  | 10,721 (1,540)    | 12,070 (182)    | 9     |
| Chr4       | 57,984,278  | 34.0 / 29.7 / 4.2        | 1,503 (13,119)  | 12,691 (1,355)    | 14,194 (172)    | 329   |
| Chr5       | 55,885,651  | 31.8 / 27.5 / 4.2        | 1,526 (11,657)  | 11,663 (1,316)    | 13,189 (177)    | 769   |
| Chr6       | 53,092,471  | 37.4 / 32.2 / 5.1        | 1,571 (12,637)  | 13,271 (1,289)    | 14,842 (181)    | 52    |
| Chr7       | 50,849,673  | 36.2 / 31.2 / 4.9        | 1,523 (12,094)  | 12,644 (1,255)    | 14,167 (176)    | 144   |
| Chr8       | 49,165,404  | 36.0 / 30.7 / 5.1        | 1,620 (10,931)  | 12,232 (1,233)    | 13,852 (182)    | 77    |
| Chr9       | 55,908,959  | 38.4 / 32.9 / 5.4        | 1,763 (12,181)  | 15,694 (1,171)    | 17,457 (171)    | 192   |
| Chr10      | 52,131,239  | 23.9 / 20.3 / 3.5        | 1,243 (10,042)  | 8,143 (1,297)     | 9,386 (197)     | 106   |
| Chr11      | 49,759,318  | 30.4 / 26.8 / 3.6        | 1,223 (12,385)  | 8,348 (1,595)     | 9,571 (185)     | 4     |
| Chr12      | 77,671,243  | 34.6 / 30.2 / 4.2        | 2,000 (13,424)  | 16,721 (1,402)    | 18,721 (172)    | 70    |
| Chr13      | 51,098,085  | 32.9 / 28.4 / 4.3        | 1,357 (12,386)  | 10,324 (1,407)    | 11,681 (190)    | 244   |
| Chr14      | 51,888,355  | 30.6 / 26.5 / 4.0        | 1,302 (12,212)  | 9,713 (1,413)     | 11,015 (188)    | 284   |
| Chr15      | 48,065,453  | 36.5 / 32.0 / 4.3        | 1,254 (13,972)  | 10,629 (1,447)    | 11,883 (174)    | 60    |
| Chr16      | 62,834,756  | 32.7 / 27.5 / 5.0        | 1,912 (10,735)  | 14,667 (1,179)    | 16,579 (190)    | 110   |
| Chr17      | 49,965,003  | 39.5 / 34.6 / 4.7        | 1,489 (13,255)  | 12,205 (1,414)    | 13,694 (173)    | 184   |
| Chr18      | 33,955,268  | 32.9 / 28.8 / 4.1        | 862 (12,965)    | 6,429 (1,522)     | 7,291 (189)     | 162   |
| Chr19      | 41,814,943  | 38.5 / 33.2 / 5.1        | 1,318 (12,199)  | 10,149 (1,366)    | 11,467 (187)    | 112   |
| Chr20      | 40,504,042  | 33.7 / 29.7 / 3.8        | 967 (14,124)    | 7,995 (1,506)     | 8,962 (171)     | 7     |
| Chr21      | 51,162,488  | 38.4 / 32.8 / 5.5        | 1,249 (15,746)  | 12,062 (1,391)    | 13,311 (209)    | 22    |

|              |                      |                          |                        |                        |                      |              |
|--------------|----------------------|--------------------------|------------------------|------------------------|----------------------|--------------|
| Chr22        | 51,158,892           | 34.9 / 29.9 / 4.7        | 1,389 (12,853)         | 11,809 (1,296)         | 13,198 (183)         | 167          |
| Chr24        | 41,094,201           | 37.0 / 32.2 / 4.6        | 1,130 (13,442)         | 9,247 (1,431)          | 10,377 (184)         | 19           |
| <b>Total</b> | <b>1,200,827,456</b> | <b>33.7 / 29.1 / 4.4</b> | <b>32,365 (12,504)</b> | <b>257,898 (1,356)</b> | <b>290,263 (183)</b> | <b>3,507</b> |

511  
512

513 Table 3. Gene ontology (GO) enrichment analysis for the 710 unique clusters identified in the  
 514 *Siphamia tubifer* genome from a three-way comparison of orthologous clusters with the non-  
 515 luminous cardinalfish *Sphaeramia orbicularis* and the mudskipper *Periophthalmus*  
 516 *magnuspinnatus* (order Gobiiformes).

| GO ID      | Description                                                                  | Count | p-value  |
|------------|------------------------------------------------------------------------------|-------|----------|
| GO:0071625 | vocalization behavior                                                        | 6     | 7.13E-07 |
| GO:0050808 | synapse organization                                                         | 8     | 8.31E-07 |
| GO:0006310 | DNA recombination                                                            | 5     | 2.52E-06 |
| GO:0015074 | DNA integration                                                              | 4     | 6.32E-06 |
| GO:0030050 | vesicle transport along actin filament                                       | 4     | 2.80E-05 |
| GO:0006313 | transposition, DNA-mediated                                                  | 4     | 4.91E-05 |
| GO:0006953 | acute-phase response                                                         | 3     | 5.44E-04 |
| GO:0075732 | viral penetration into host nucleus                                          | 2     | 6.69E-04 |
| GO:0032185 | septin cytoskeleton organization                                             | 2     | 6.69E-04 |
| GO:0001764 | neuron migration                                                             | 3     | 1.24E-03 |
| GO:0071805 | potassium ion transmembrane transport                                        | 3     | 1.24E-03 |
| GO:0034765 | regulation of ion transmembrane transport                                    | 8     | 1.35E-03 |
| GO:0003964 | RNA-directed DNA polymerase activity                                         | 2     | 1.95E-03 |
| GO:0043516 | regulation of DNA damage response, signal transduction by p53 class mediator | 2     | 1.95E-03 |
| GO:0044826 | viral genome integration into host DNA                                       | 2     | 1.95E-03 |
| GO:1900044 | regulation of protein K63-linked ubiquitination                              | 2     | 1.95E-03 |
| GO:0032197 | transposition, RNA-mediated                                                  | 2     | 1.95E-03 |
| GO:0047369 | succinate-hydroxymethylglutarate CoA-transferase activity                    | 2     | 1.95E-03 |
| GO:0007522 | visceral muscle development                                                  | 2     | 1.95E-03 |
| GO:0006261 | DNA-dependent DNA replication                                                | 2     | 1.95E-03 |
| GO:0090129 | positive regulation of synapse maturation                                    | 2     | 1.95E-03 |
| GO:0043551 | regulation of phosphatidylinositol 3-kinase activity                         | 2     | 1.95E-03 |
| GO:0045162 | clustering of voltage-gated sodium channels                                  | 2     | 1.95E-03 |
| GO:0045214 | sarcomere organization                                                       | 4     | 2.03E-03 |
| GO:0015031 | protein transport                                                            | 10    | 3.13E-03 |
| GO:0008154 | actin polymerization or depolymerization                                     | 2     | 3.81E-03 |

517

518 **References**

519

520 Altschul, S.F., Gish, W., Miller, W., Myers, E.W. & Lipman, D.J. (1990) "Basic local alignment  
521 search tool." *J. Mol. Biol.* 215:403-410

522

523 Belcaid, M., Casaburi, G., McAnulty, S. J., Schmidbaur, H., Suria, A. M., Moriano-Gutierrez, S.,  
524 Pankey, M.S., Oakley, T.H., Kremer, N., Koch, E.J., Collins, A.J... & Nyholm, S. V. (2019).  
525 Symbiotic organs shaped by distinct modes of genome evolution in cephalopods. *Proceedings*  
526 *of the National Academy of Sciences*, 116(8), 3030-3035.

527

528 Belton, J. M., McCord, R. P., Gibcus, J. H., Naumova, N., Zhan, Y., & Dekker, J. (2012). Hi-C: a  
529 comprehensive technique to capture the conformation of genomes. *Methods*, 58(3), 268-276.

530

531 Benson, G. (1999). Tandem repeats finder: a program to analyze DNA sequences. *Nucleic*  
532 *acids research*, 27(2), 573-580.

533

534 Bernt, M., Donath, A., Jühling, F., Externbrink, F., Florentz, C., Fritzscht, G., Pütz, J.,  
535 Middendorf, M. & Stadler, P.F., (2013). MITOS: improved de novo metazoan mitochondrial  
536 genome annotation. *Molecular phylogenetics and evolution*, 69(2), 313-319.

537

538 Brúna, T., Lomsadze, A., & Borodovsky, M. (2020). GeneMark-EP+: eukaryotic gene prediction  
539 with self-training in the space of genes and proteins. *NAR genomics and bioinformatics*, 2(2),  
540 lqaa026.

541

542 Brúna, T., Hoff, K. J., Lomsadze, A., Stanke, M., & Borodovsky, M. (2021). BRAKER2:  
543 Automatic eukaryotic genome annotation with GeneMark-EP+ and AUGUSTUS supported by a  
544 protein database. *NAR genomics and bioinformatics*, 3(1), lqaa108.

545

546 Chakraborty, M., Baldwin-Brown, J. G., Long, A. D., & Emerson, J. J. (2016). Contiguous and  
547 accurate de novo assembly of metazoan genomes with modest long read coverage. *Nucleic*  
548 *acids research*, 44(19), e147.

549

550 Chan, P. P., Lin, B. Y., Mak, A. J., & Lowe, T. M. (2021). tRNAscan-SE 2.0: improved detection  
551 and functional classification of transfer RNA genes. *Nucleic Acid Research*.  
552 *doi:10.1093/nar/gkab688*

553

554 Cheng, H., Concepcion, G.T., Feng, X. Zhang, H. & Li, H. (2021). Haplotype-resolved de novo  
555 assembly using phased assembly graphs with hifiasm. *Nat Methods* 18, 170-175  
556 <https://doi.org/10.1038/s41592-020-01056-5>

557

558 Dudchenko, O., Batra, S. S., Omer, A. D., Nyquist, S. K., Hoeger, M., Durand, N. C., Shamim,  
559 M.S., Machol, I., Lander, E.S., Aiden, A.P. & Aiden, E. L. (2017). De novo assembly of the

560 *Aedes aegypti* genome using Hi-C yields chromosome-length scaffolds. *Science*, 356(6333),  
561 92-95.  
562  
563 Dudchenko, O., Shamim, M. S., Batra, S. S., Durand, N. C., Musial, N. T., Mostofa, R., Pham,  
564 M., St Hilaire, B.G., Yao, W., Stamenova, E. and Hoeger, M., ...& Aiden, E. L. (2018). The  
565 Juicebox Assembly Tools module facilitates de novo assembly of mammalian genomes with  
566 chromosome-length scaffolds for under \$1000. *BioRxiv*, 254797.  
567  
568 Dunlap, P. V., & Nakamura, M. (2011). Functional morphology of the luminescence system of  
569 *Siphamia versicolor* (Perciformes: Apogonidae), a bacterially luminous coral reef fish. *Journal of*  
570 *morphology*, 272(8), 897-909.  
571  
572 Dunlap, P. V., Gould, A. L., Wittenrich, M. L., & Nakamura, M. (2012). Symbiosis initiation in the  
573 bacterially luminous sea urchin cardinalfish *Siphamia versicolor*. *Journal of fish biology*, 81(4),  
574 1340-1356.  
575  
576 Durand, N. C., Robinson, J. T., Shamim, M. S., Machol, I., Mesirov, J. P., Lander, E. S., &  
577 Aiden, E. L. (2016a). Juicebox provides a visualization system for Hi-C contact maps with  
578 unlimited zoom. *Cell systems*, 3(1), 99-101.  
579  
580 Durand, N. C., Shamim, M. S., Machol, I., Rao, S. S., Huntley, M. H., Lander, E. S., & Aiden, E.  
581 L. (2016b). Juicer provides a one-click system for analyzing loop-resolution Hi-C experiments.  
582 *Cell systems*, 3(1), 95-98.  
583  
584 Eibl-Eibesfeldt, I. (1961). Eine symbiose zwischen fischen (*Siphamia versicolor*) und seeigeln.  
585 *Zeitschrift für Tierpsychologie*, 18(1), 56-59.  
586  
587 Faber, J. E., & Stepien, C. A. (1998). Tandemly repeated sequences in the mitochondrial DNA  
588 control region and phylogeography of the pike-perchesstizostedion. *Molecular phylogenetics*  
589 *and evolution*, 10(3), 310-322.  
590  
591 Farrer, R. A. (2017). Synima: a Synteny imaging tool for annotated genome assemblies. *BMC*  
592 *bioinformatics*, 18(1), 1-4.  
593  
594 Flynn, J. M., Hubley, R., Goubert, C., Rosen, J., Clark, A. G., Feschotte, C., & Smit, A. F.  
595 (2020). RepeatModeler2 for automated genomic discovery of transposable element families.  
596 *Proceedings of the National Academy of Sciences*, 117(17), 9451-9457.  
597  
598 Formenti, G., Rhie, A., Balacco, J., Haase, B., Mountcastle, J., Fedrigo, O., Brown, S.,  
599 Capodiferro, M.R., Al-Ajli, F.O., Ambrosini, R. and Houde, P... & Jarvis, E. D. (2021). Complete  
600 vertebrate mitogenomes reveal widespread repeats and gene duplications. *Genome biology*,  
601 22(1), 1-22.  
602



603 Ghezelayagh, A., Harrington, R.C., Burrell, E.D., Campbell, M.A., Buckner, J.C., Chakrabarty,  
604 P., Glass, J.R., McCraney, W.T., Unmack, P.J., Thacker, C.E., Alfaro, M.E. . & Near, T. J.  
605 (2021). Prolonged morphological expansion of spiny-rayed fishes following the end-  
606 Cretaceous.  
607  
608 Gon, O., & Allen, G. R. (2012). Revision of the Indo-Pacific cardinalfish genus *Siphamia*  
609 (Perciformes: Apogonidae). *Zootaxa*, 3294(1), 1-84.  
610  
611 Gould, A. L., & Dunlap, P. V. (2017). Genomic analysis of a cardinalfish with larval homing  
612 potential reveals genetic admixture in the Okinawa Islands. *Molecular ecology*, 26(15), 3870-  
613 3882.  
614  
615 Gould, A. L., & Dunlap, P. V. (2019). Shedding light on specificity: population genomic structure  
616 of a symbiosis between a coral reef fish and luminous bacterium. *Frontiers in microbiology*, 10,  
617 2670.  
618  
619 Gould, A. L., Harii, S., & Dunlap, P. V. (2014). Host preference, site fidelity, and homing  
620 behavior of the symbiotically luminous cardinalfish, *Siphamia tubifer* (Perciformes:  
621 Apogonidae). *Marine biology*, 161(12), 2897-2907.  
622  
623 Gould, A. L., Harii, S., & Dunlap, P. V. (2015). Cues from the reef: olfactory preferences of a  
624 symbiotically luminous cardinalfish. *Coral Reefs*, 34(2), 673-677.  
625  
626 Gould, A. L., Dougan, K. E., Koenigbauer, S. T., & Dunlap, P. V. (2016). Life history of the  
627 symbiotically luminous cardinalfish *Siphamia tubifer* (Perciformes: Apogonidae). *Journal of fish*  
628 *biology*, 89(2), 1359-1377.  
629  
630 Gould, A., Fritts-Penniman, A., & Gaisiner, A. (2021). Museum genomics illuminate the high  
631 specificity of a bioluminescent symbiosis across a genus of reef fish. *Frontiers in Ecology and*  
632 *Evolution*, 9, 18.  
633  
634 Guan, D., McCarthy, S. A., Wood, J., Howe, K., Wang, Y., & Durbin, R. (2020). Identifying and  
635 removing haplotypic duplication in primary genome assemblies. *Bioinformatics*, 36(9), 2896-  
636 2898.  
637  
638 Haas, B. J., Delcher, A. L., Wortman, J. R., & Salzberg, S. L. (2004). DAGchainer: a tool for  
639 mining segmental genome duplications and synteny. *Bioinformatics*, 20(18), 3643-3646.  
640  
641 Hoarau, G., Holla, S., Lescasse, R., Stam, W. T., & Olsen, J. L. (2002). Heteroplasmy and  
642 evidence for recombination in the mitochondrial control region of the flatfish *Platichthys flesus*.  
643 *Molecular Biology and Evolution*, 19(12), 2261-2264.  
644

- 645 Inoue JG, Miya M, Tsukamoto K, Nishida M. (2003). Evolution of the deep-sea gulper eel  
646 mitochondrial genomes: large-scale gene rearrangements originated within the eels. *Mol Biol*  
647 *Evol.* 20:1917–1924.  
648
- 649 Iwai, T. (1958). A study of the luminous organ of the apogonid fish *Siphamia versicolor* (Smith  
650 and Radcliffe). *Journal of the Washington Academy of Sciences*, 48(8), 267-270.  
651
- 652 Iwai, T. (1971). Structure of luminescent organ of apogonid fish, *Siphamia versicolor*. *Japanese*  
653 *Journal of Ichthyology*, 18(3), 125-127.  
654
- 655 Jones, P., Binns, D., Chang, H. Y., Fraser, M., Li, W., McAnulla, C., McWilliam, H., Maslen, J.,  
656 Mitchell, A., Nuka, G., Pesseat, S., ... & Hunter, S. (2014). InterProScan 5: genome-scale  
657 protein function classification. *Bioinformatics*, 30(9), 1236-1240.  
658
- 659 Jühling, F., Pütz, J., Bernt, M., Donath, A., Middendorf, M., Florentz, C., & Stadler, P. F. (2012).  
660 Improved systematic tRNA gene annotation allows new insights into the evolution of  
661 mitochondrial tRNA structures and into the mechanisms of mitochondrial genome  
662 rearrangements. *Nucleic acids research*, 40(7), 2833-2845.  
663
- 664 Kaeding, A. J., Ast, J. C., Pearce, M. M., Urbanczyk, H., Kimura, S., Endo, H., ... & Dunlap, P.  
665 V. (2007). Phylogenetic diversity and cosymbiosis in the bioluminescent symbioses of  
666 “*Photobacterium mandapamensis*”. *Applied and Environmental Microbiology*, 73(10), 3173-  
667 3182.  
668
- 669 Karin, E. L., Mirdita, M., & Söding, J. (2020). MetaEuk—sensitive, high-throughput gene  
670 discovery, and annotation for large-scale eukaryotic metagenomics. *Microbiome*, 8(1), 1-15.  
671
- 672 Katoh, K., Misawa, K., Kuma, K. I., & Miyata, T. (2002). MAFFT: a novel method for rapid  
673 multiple sequence alignment based on fast Fourier transform. *Nucleic acids research*, 30(14),  
674 3059-3066.  
675
- 676 Keller, O., Kollmar, M., Stanke, M., & Waack, S. (2011). A novel hybrid gene prediction method  
677 employing protein multiple sequence alignments. *Bioinformatics*, 27(6), 757-763.  
678
- 679 Kozlov, A. M., Darriba, D., Flouri, T., Morel, B., & Stamatakis, A. (2019). RAxML-NG: a fast,  
680 scalable and user-friendly tool for maximum likelihood phylogenetic inference. *Bioinformatics*,  
681 35(21), 4453-4455.  
682
- 683 Kriventseva, E. V., Kuznetsov, D., Tegenfeldt, F., Manni, M., Dias, R., Simão, F. A., & Zdobnov,  
684 E. M. (2019). OrthoDB v10: sampling the diversity of animal, plant, fungal, protist, bacterial and  
685 viral genomes for evolutionary and functional annotations of orthologs. *Nucleic acids research*,  
686 47(D1), D807-D811.  
687

- 688 Krzywinski, M., Schein, J., Birol, I., Connors, J., Gascoyne, R., Horsman, D., Jones, S.J. and  
689 Marra, M.A. (2009). Circos: an information aesthetic for comparative genomics. *Genome*  
690 *research*, 19(9), 1639-1645.  
691
- 692 Li, D., Liu, C. M., Luo, R., Sadakane, K., & Lam, T. W. (2015). MEGAHIT: an ultra-fast single-  
693 node solution for large and complex metagenomics assembly via succinct de Bruijn graph.  
694 *Bioinformatics*, 31(10), 1674-1676.  
695
- 696 Li, H. (2018). Minimap2: pairwise alignment for nucleotide sequences. *Bioinformatics*, 34(18),  
697 3094-3100.  
698
- 699 Lieberman-Aiden, E., Van Berkum, N.L., Williams, L., Imakaev, M., Ragozy, T., Telling, A.,  
700 Amit, I., Lajoie, B.R., Sabo, P.J., Dorschner, M.O. and Sandstrom, R., ... & Dekker, J. (2009).  
701 Comprehensive mapping of long-range interactions reveals folding principles of the human  
702 genome. *science*, 326(5950), 289-293.  
703
- 704 Ludwig, A., May, B., Debus, L., & Jenneckens, I. (2000). Heteroplasmy in the mtDNA control  
705 region of sturgeon (*Acipenser*, *Huso* and *Scaphirhynchus*). *Genetics*, 156(4), 1933-1947.  
706
- 707 Marçais, G., & Kingsford, C. (2012). Jellyfish: A fast k-mer counter. *Tutorialis e Manuais*, 1, 1-8.  
708
- 709 Nguyen, L. T., Schmidt, H. A., Von Haeseler, A., & Minh, B. Q. (2015). IQ-TREE: a fast and  
710 effective stochastic algorithm for estimating maximum-likelihood phylogenies. *Molecular*  
711 *biology and evolution*, 32(1), 268-274.  
712
- 713 PacificBiosciences (2020). Ipa hifi genome assembler.  
714
- 715 Poulsen JY, Byrkjedal I, Willassen E, Rees D, Takeshima H, Satoh TP, Shinohara G, Nishida M,  
716 Miya M. (2013). Mitogenomic sequences and evidence from unique gene rearrangements  
717 corroborate evolutionary relationships of Myctophiformes (Neoteleostei). *BMC Evol Biol*.  
718 13:111  
719
- 720 Poulsen, J. Y., Sado, T., & Miya, M. (2019). Unique mitochondrial gene order in  
721 *Xenodermichthys copei* (Alepocephalidae: Otocephala)—a first observation of a large-scale  
722 rearranged 16S–WANCY region in vertebrates. *Mitochondrial DNA Part B*, 4(1), 511-514.  
723
- 724 Quinn, T. W., & Wilson, A. C. (1993). Sequence evolution in and around the mitochondrial  
725 control region in birds. *Journal of molecular evolution*, 37(4), 417-425.  
726
- 727 Ranallo-Benavidez, T.R., Jaron, K.S. & Schatz, M.C. GenomeScope 2.0 and Smudgeplot for  
728 reference-free profiling of polyploid genomes. *Nature Communications* 11, 1432 (2020).  
729

- 730 Rao, S.S., Huntley, M.H., Durand, N.C., Stamenova, E.K., Bochkov, I.D., Robinson, J.T.,  
731 Sanborn, A.L., Machol, I., Omer, A.D., Lander, E.S. and Aiden, E.L. (2014). A 3D map of the  
732 human genome at kilobase resolution reveals principles of chromatin looping. *Cell*, 159(7),  
733 1665-1680.
- 734
- 735 Samonte, I. E., Pagulayan, R. C., & Mayer, W. E. (2000). Molecular phylogeny of Philippine  
736 freshwater sardines based on mitochondrial DNA analysis. *Journal of Heredity*, 91(3), 247-253  
737
- 738 Simão, F. A., Waterhouse, R. M., Ioannidis, P., Kriventseva, E. V., & Zdobnov, E. M. (2015).  
739 BUSCO: assessing genome assembly and annotation completeness with single-copy  
740 orthologs. *Bioinformatics*, 31(19), 3210-3212.
- 741
- 742 Smit, AFA, Hubley, R & Green, P. *RepeatMasker Open-4.0*. 2013-2015  
743 <<http://www.repeatmasker.org>>  
744
- 745 Tamura, R. (1982). Experimental observations on the association between the cardinalfish  
746 (*Siphamia versicolor*) and the sea urchin (*Diadema setosum*). *Galaxea*, 1, 1-10.  
747
- 748 Thacker, C. E. (2014). Species and shape diversification are inversely correlated among gobies  
749 and cardinalfishes (Teleostei: Gobiiformes). *Organisms Diversity & Evolution*, 14(4), 419-436.  
750
- 751 Turanov, S. V., Lee, Y. H., & Kartavtsev, Y. P. (2019). Structure, evolution and phylogenetic  
752 informativeness of eelpouts (Cottoidei: Zoarcales) mitochondrial control region sequences.  
753 *Mitochondrial DNA Part A*, 30(2), 264-272.
- 754
- 755 Urbanczyk, H., Ogura, Y., Hendry, T. A., Gould, A. L., Kiwaki, N., Atkinson, J. T., Hayashi, T. &  
756 Dunlap, P. V. (2011). Genome sequence of *Photobacterium mandapamensis* strain svers. 1.1,  
757 the bioluminescent symbiont of the cardinal fish *Siphamia versicolor*.
- 758
- 759 Van Berkum, N.L., Lieberman-Aiden, E., Williams, L., Imakaev, M., Gnirke, A., Mirny, L.A.,  
760 Dekker, J. and Lander, E.S. (2010). Hi-C: a method to study the three-dimensional architecture  
761 of genomes. *JoVE (Journal of Visualized Experiments)*, (39), e1869.  
762
- 763 Wada, M., Kamiya, A., Uchiyama, N., Yoshizawa, S., Kita-Tsukamoto, K., Ikejima, K., ... &  
764 Kogure, K. (2006). Lux A gene of light organ symbionts of the bioluminescent fish *Acropoma*  
765 *japonicum* (Acropomatidae) and *Siphamia versicolor* (Apogonidae) forms a lineage closely  
766 related to that of *Photobacterium leiognathi* ssp. *mandapamensis*. *FEMS microbiology letters*,  
767 260(2), 186-192.
- 768
- 769 Xu, L., Dong, Z., Fang, L., Luo, Y., Wei, Z., Guo, H., Zhang, G., Gu, Y.Q., Coleman-Derr, D., Xia,  
770 Q. and Wang, Y. (2019). OrthoVenn2: a web server for whole-genome comparison and  
771 annotation of orthologous clusters across multiple species. *Nucleic acids research*, 47(W1),  
772 W52-W58.

773

774 Yoshiba, S., & Haneda, Y. (1967). Bacteriological study on the symbiotic luminous bacteria  
775 cultivated from the luminous organ of the apogonid fish, *Siphamia versicolor* and the Australian  
776 pine cone fish, *Cleidopus gloriamaris*. *Sci. Rep. Yokosuka City Mus*, 13, 82-84.

777
